# Supplementary material
Source: publisher figshare collection journal article supplement (https://acs.figshare.com/ndownloader/files/5090053)
Supplement: Supplementary file 1 [file 5090053]

 
data_k902 
 
_audit_creation_method            SHELXL-97 
_chemical_name_systematic 
; 
 ? 
; 
_chemical_name_common             ? 
_chemical_melting_point           ? 
_chemical_formula_moiety          'C37 H28 N6 O Ru 2+, 2 P F6 -, C3 H6 O'
_chemical_formula_sum 
 'C40 H34 N6 O2 F12 P2 Ru' 
_chemical_formula_weight          1021.74 
 
loop_ 
 _atom_type_symbol 
 _atom_type_description 
 _atom_type_scat_dispersion_real 
 _atom_type_scat_dispersion_imag 
 _atom_type_scat_source 
 'C'  'C'   0.0033   0.0016 
 'International Tables Vol C Tables 4.2.6.8 and 6.1.1.4' 
 'H'  'H'   0.0000   0.0000 
 'International Tables Vol C Tables 4.2.6.8 and 6.1.1.4' 
 'N'  'N'   0.0061   0.0033 
 'International Tables Vol C Tables 4.2.6.8 and 6.1.1.4' 
 'O'  'O'   0.0106   0.0060 
 'International Tables Vol C Tables 4.2.6.8 and 6.1.1.4' 
 'F'  'F'   0.0171   0.0103 
 'International Tables Vol C Tables 4.2.6.8 and 6.1.1.4' 
 'P'  'P'   0.1023   0.0942 
 'International Tables Vol C Tables 4.2.6.8 and 6.1.1.4' 
 'Ru'  'Ru'  -1.2594   0.8363 
 'International Tables Vol C Tables 4.2.6.8 and 6.1.1.4' 
 
_symmetry_cell_setting            Triclinic 
_symmetry_space_group_name_H-M    P-1 
 
loop_ 
 _symmetry_equiv_pos_as_xyz 
 'x, y, z' 
 '-x, -y, -z' 
 
_cell_length_a                    9.3774(10) 
_cell_length_b                    10.4788(11) 
_cell_length_c                    20.8407(22) 
_cell_angle_alpha                 82.873(2) 
_cell_angle_beta                  86.533(2) 
_cell_angle_gamma                 85.432(2) 
_cell_volume                      2023.0(4) 
_cell_formula_units_Z             2 
_cell_measurement_temperature     223(2) 
_cell_measurement_reflns_used     3056 
_cell_measurement_theta_min       1.96 
_cell_measurement_theta_max       23.53 
 
_exptl_crystal_description        'Flat needle' 
_exptl_crystal_colour             Green 
_exptl_crystal_size_max           0.50 
_exptl_crystal_size_mid           0.06 
_exptl_crystal_size_min           0.03 
_exptl_crystal_density_diffrn     1.677 
_exptl_crystal_density_method     'not measured' 
_exptl_crystal_F_000              1028 
_exptl_absorpt_coefficient_mu     0.568 
_exptl_absorpt_correction_type    Empirical 
_exptl_absorpt_correction_T_min   0.6383 
_exptl_absorpt_correction_T_max   0.9401 
_exptl_absorpt_process_details    ? 
 
_publ_section_experimental 
; 
 All measurements were made with a Siemens SMART platform 
 diffractometer equipped with a 1K CCD area detector.  A
 hemisphere of data (1271 frames at 5 cm detector distance)
 was collected using a narrow-frame method with scan widths of
 0.30\% in omega and an exposure time of 30 s/frame.  The first
 50 frames were re-measured at the end of data collection to 
 monitor instrument and crystal stability, and the maximum
 correction on I was <1%.  The data were integrated using the
 Siemens SAINT program, with the intensities corrected for 
 Lorentz factor, polarization, air absorption, and absorption
 due to variation in the path length through the detector
 faceplate.  A psi scan absorption correction was applied based
 on the entire data set.  Redundant reflections were averaged.
 Final cell constants were refined using 3056 reflections
 having I>10\s(I), and these, along with other information
 pertinent to data collection and refinement, are listed in 
 Table 1.  The Laue symmetry was determined to be -1, and
 the space group was shown to be either P1 or P-1.  The two
 PF6 anions and the acetone solvent were found to be massively
 disordered, with three major orientations located at each site.
 This was treated by refinement of ideal rigid bodies, with
 occupancy factors determined by analysis of isotropic thermal
 parameters.  The combination of extremely small sample size 
 and severe disorder resulted in a disappointingly small number
 of observed data.  Because of this, attempts to refine all but  
 one of the disordered groups anisotropically failed, and it was
 finally necessary to refine them isotropically. 

 Acknowledgment for use of MRSEC/TCSUH Facilities:

    This work made use of MRSEC/TCSUH Shared Experimental Facilities
 supported by the National Science Foundation under Award Number
 DMR-9632667 and the Texas Center for Superconductivity at the
 University of Houston.
; 
 
_publ_section_figure_captions 
;
 Fig. 1 -- View of the cation showing the atom numbering
   scheme for the non-carbon atoms.  Thermal ellipsoids are 
   40% equiprobability envelopes, with hydrogens omitted.

 Fig. 2 -- Side view of the cation.

 Fig. 3 -- Packing of the molecules in the unit cell.  Only one
   orientation of each disordered molecule is shown at any site.
;
 
_diffrn_ambient_temperature       223(2) 
_diffrn_radiation_wavelength      0.71073 
_diffrn_radiation_type            MoK\a 
_diffrn_radiation_source          'fine-focus sealed tube' 
_diffrn_radiation_monochromator   graphite 
_diffrn_measurement_device_type   'Siemens SMART CCD'
_diffrn_measurement_method        CCD 
_diffrn_detector_area_resol_mean  1K 
_diffrn_standards_decay_%         0.0 
_diffrn_reflns_number             9408
_diffrn_reflns_av_R_equivalents   0.0517
_diffrn_reflns_av_sigmaI/netI     0.0813 
_diffrn_reflns_limit_h_min        -10 
_diffrn_reflns_limit_h_max        10 
_diffrn_reflns_limit_k_min        -11 
_diffrn_reflns_limit_k_max        11 
_diffrn_reflns_limit_l_min        0 
_diffrn_reflns_limit_l_max        23 
_diffrn_reflns_theta_min          1.96 
_diffrn_reflns_theta_max          23.53 
_reflns_number_total              5966 
_reflns_number_gt                 3453
_reflns_threshold_expression      >4sigma(I) 
 
_computing_data_collection        'Siemens SMART software (Siemens, 1996)' 
_computing_cell_refinement        'Bruker SAINT software (Bruker, 1999)' 
_computing_data_reduction         'Bruker SAINT software (Bruker, 1999)' 
_computing_structure_solution     'SHELXS-97 (Sheldrick, 1997)' 
_computing_structure_refinement   'SHELXL-97 (Sheldrick, 1997)' 
_computing_molecular_graphics     ? 
_computing_publication_material   ? 
 
_refine_special_details 
; 
 Refinement of F^2^ against ALL reflections.  The weighted R-factor wR and 
 goodness of fit S are based on F^2^, conventional R-factors R are based 
 on F, with F set to zero for negative F^2^. The threshold expression of 
 F^2^ > 4sigma(F^2^) is used only for calculating R-factors(gt) etc. and is 
 not relevant to the choice of reflections for refinement.  R-factors based 
 on F^2^ are statistically about twice as large as those based on F, and R- 
 factors based on ALL data will be even larger. 
; 
 
_refine_ls_structure_factor_coef  Fsqd  
_refine_ls_matrix_type            full 
_refine_ls_weighting_scheme       calc  
_refine_ls_weighting_details 
 'calc w=1/[\s^2^(Fo^2^)+(0.0686P)^2^+11.7988P] where P=(Fo^2^+2Fc^2^)/3' 
_atom_sites_solution_primary      direct 
_atom_sites_solution_secondary    difmap 
_atom_sites_solution_hydrogens    geom 
_refine_ls_hydrogen_treatment     mixed 
_refine_ls_extinction_method      none 
_refine_ls_number_reflns          5966 
_refine_ls_number_parameters      504 
_refine_ls_number_restraints      0 
_refine_ls_R_factor_all           0.1143 
_refine_ls_R_factor_gt            0.0576 
_refine_ls_wR_factor_ref          0.1768 
_refine_ls_wR_factor_gt           0.1357 
_refine_ls_goodness_of_fit_ref    1.064 
_refine_ls_restrained_S_all       1.064 
_refine_ls_shift/su_max           0.199 
_refine_ls_shift/su_mean          0.020 
 
loop_ 
 _atom_site_label 
 _atom_site_type_symbol 
 _atom_site_fract_x 
 _atom_site_fract_y 
 _atom_site_fract_z 
 _atom_site_U_iso_or_equiv 
 _atom_site_adp_type 
 _atom_site_occupancy 
 _atom_site_symmetry_multiplicity 
 _atom_site_calc_flag 
 _atom_site_refinement_flags 
 _atom_site_disorder_assembly 
 _atom_site_disorder_group 
Ru Ru 0.49238(7) 0.67815(6) 0.73451(3) 0.0219(2) Uani 1 1 d . . . 
N1 N 0.6847(7) 0.5732(6) 0.7095(3) 0.0241(15) Uani 1 1 d . . . 
C2 C 0.7234(8) 0.4468(8) 0.7165(4) 0.0295(19) Uani 1 1 d . . . 
H2 H 0.6583 0.3903 0.7380 0.035 Uiso 1 1 calc R . . 
C3 C 0.8555(9) 0.3944(8) 0.6935(4) 0.037(2) Uani 1 1 d . . . 
H3 H 0.8779 0.3048 0.7001 0.045 Uiso 1 1 calc R . . 
C4 C 0.9515(9) 0.4732(9) 0.6614(4) 0.038(2) Uani 1 1 d . . . 
H4 H 1.0394 0.4389 0.6444 0.045 Uiso 1 1 calc R . . 
C5 C 0.9170(9) 0.6073(9) 0.6542(4) 0.034(2) Uani 1 1 d . . . 
C6 C 1.0132(9) 0.6984(10) 0.6238(4) 0.042(2) Uani 1 1 d . . . 
H6 H 1.1038 0.6682 0.6077 0.051 Uiso 1 1 calc R . . 
C7 C 0.9775(10) 0.8266(10) 0.6176(4) 0.047(3) Uani 1 1 d . . . 
H7 H 1.0423 0.8842 0.5968 0.056 Uiso 1 1 calc R . . 
C8 C 0.8424(9) 0.8746(9) 0.6425(4) 0.036(2) Uani 1 1 d . . . 
C9 C 0.7989(11) 1.0064(9) 0.6390(5) 0.046(2) Uani 1 1 d . . . 
H9 H 0.8596 1.0682 0.6187 0.055 Uiso 1 1 calc R . . 
C10 C 0.6699(11) 1.0438(8) 0.6650(4) 0.044(2) Uani 1 1 d . . . 
H10 H 0.6414 1.1322 0.6629 0.053 Uiso 1 1 calc R . . 
C11 C 0.5773(9) 0.9534(8) 0.6951(4) 0.032(2) Uani 1 1 d . . . 
N12 N 0.6133(7) 0.8255(6) 0.6993(3) 0.0245(15) Uani 1 1 d . . . 
C13 C 0.7450(8) 0.7875(8) 0.6730(4) 0.0272(18) Uani 1 1 d . . . 
C14 C 0.7835(8) 0.6510(7) 0.6785(3) 0.0238(18) Uani 1 1 d . . . 
C15 C 0.4343(10) 1.0040(8) 0.7225(4) 0.038(2) Uani 1 1 d . . . 
O16 O 0.4220(7) 1.1194(6) 0.7292(3) 0.0565(19) Uani 1 1 d . . . 
N17 N 0.3187(7) 0.7978(7) 0.7513(3) 0.0292(16) Uani 1 1 d . . . 
C18 C 0.3074(9) 0.9289(8) 0.7415(4) 0.036(2) Uani 1 1 d . . . 
C19 C 0.1746(11) 0.9993(10) 0.7508(4) 0.049(3) Uani 1 1 d . . . 
H19 H 0.1684 1.0897 0.7421 0.059 Uiso 1 1 calc R . . 
C20 C 0.0559(11) 0.9377(11) 0.7722(5) 0.051(3) Uani 1 1 d . . . 
H20 H -0.0321 0.9855 0.7779 0.061 Uiso 1 1 calc R . . 
C21 C 0.0640(9) 0.8031(10) 0.7858(4) 0.045(2) Uani 1 1 d . . . 
C22 C -0.0540(10) 0.7303(13) 0.8108(5) 0.057(3) Uani 1 1 d . . . 
H22 H -0.1439 0.7734 0.8187 0.068 Uiso 1 1 calc R . . 
C23 C -0.0381(10) 0.6006(13) 0.8231(5) 0.057(3) Uani 1 1 d . . . 
H23 H -0.1170 0.5553 0.8404 0.068 Uiso 1 1 calc R . . 
C24 C 0.0947(9) 0.5306(10) 0.8105(4) 0.040(2) Uani 1 1 d . . . 
C25 C 0.1151(10) 0.3959(10) 0.8215(4) 0.048(3) Uani 1 1 d . . . 
H25 H 0.0395 0.3462 0.8386 0.057 Uiso 1 1 calc R . . 
C26 C 0.2459(10) 0.3385(9) 0.8070(4) 0.045(3) Uani 1 1 d . . . 
H26 H 0.2617 0.2483 0.8144 0.054 Uiso 1 1 calc R . . 
C27 C 0.3571(10) 0.4133(8) 0.7811(4) 0.037(2) Uani 1 1 d . . . 
H27 H 0.4459 0.3705 0.7707 0.044 Uiso 1 1 calc R . . 
N28 N 0.3447(7) 0.5417(7) 0.7702(3) 0.0292(16) Uani 1 1 d . . . 
C29 C 0.2126(8) 0.5996(9) 0.7846(4) 0.030(2) Uani 1 1 d . . . 
C30 C 0.1967(8) 0.7378(9) 0.7730(4) 0.033(2) Uani 1 1 d . . . 
N31 N 0.5523(6) 0.6769(6) 0.8306(3) 0.0241(15) Uani 1 1 d . . . 
C32 C 0.5539(8) 0.7834(8) 0.8595(4) 0.031(2) Uani 1 1 d . . . 
H32 H 0.5318 0.8636 0.8352 0.037 Uiso 1 1 calc R . . 
C33 C 0.5864(9) 0.7814(8) 0.9233(4) 0.036(2) Uani 1 1 d . . . 
H33 H 0.5839 0.8595 0.9413 0.043 Uiso 1 1 calc R . . 
C34 C 0.6226(9) 0.6666(8) 0.9614(4) 0.034(2) Uani 1 1 d . . . 
C35 C 0.6239(9) 0.5546(8) 0.9308(4) 0.0311(19) Uani 1 1 d . . . 
H35 H 0.6487 0.4736 0.9537 0.037 Uiso 1 1 calc R . . 
C36 C 0.5887(8) 0.5634(8) 0.8672(4) 0.0267(18) Uani 1 1 d . . . 
H36 H 0.5900 0.4869 0.8479 0.032 Uiso 1 1 calc R . . 
C37 C 0.6563(10) 0.6633(9) 1.0309(4) 0.046(2) Uani 1 1 d . . . 
H37A H 0.7063 0.5811 1.0454 0.068 Uiso 1 1 calc R . . 
H37B H 0.5680 0.6741 1.0570 0.068 Uiso 1 1 calc R . . 
H37C H 0.7165 0.7324 1.0353 0.068 Uiso 1 1 calc R . . 
N38 N 0.4292(6) 0.6700(6) 0.6404(3) 0.0230(15) Uani 1 1 d . . . 
C39 C 0.3970(8) 0.7739(8) 0.5985(4) 0.0282(19) Uani 1 1 d . . . 
H39 H 0.4056 0.8555 0.6115 0.034 Uiso 1 1 calc R . . 
C40 C 0.3517(8) 0.7680(7) 0.5371(4) 0.0287(19) Uani 1 1 d . . . 
H40 H 0.3321 0.8444 0.5094 0.034 Uiso 1 1 calc R . . 
C41 C 0.3352(8) 0.6500(8) 0.5164(4) 0.0290(19) Uani 1 1 d . . . 
C42 C 0.3694(8) 0.5413(8) 0.5596(4) 0.0291(19) Uani 1 1 d . . . 
H42 H 0.3614 0.4589 0.5473 0.035 Uiso 1 1 calc R . . 
C43 C 0.4147(8) 0.5529(8) 0.6199(4) 0.0282(19) Uani 1 1 d . . . 
H43 H 0.4365 0.4777 0.6481 0.034 Uiso 1 1 calc R . . 
C44 C 0.2808(11) 0.6383(9) 0.4515(4) 0.047(2) Uani 1 1 d . . . 
H44A H 0.1855 0.6812 0.4482 0.070 Uiso 1 1 calc R . . 
H44B H 0.2771 0.5479 0.4464 0.070 Uiso 1 1 calc R . . 
H44C H 0.3444 0.6782 0.4178 0.070 Uiso 1 1 calc R . . 
C45 C 0.1578(14) 0.7529(14) 0.9462(8) 0.062(2) Uiso 0.50 1 d PG A 1 
O46 O 0.245(2) 0.6741(18) 0.9248(12) 0.062(2) Uiso 0.50 1 d PG A 1 
C47 C 0.175(2) 0.8929(15) 0.9322(14) 0.062(2) Uiso 0.50 1 d PG A 1 
H47A H 0.2608 0.9066 0.9055 0.093 Uiso 0.50 1 d PG A 1 
H47B H 0.0940 0.9343 0.9100 0.093 Uiso 0.50 1 d PG A 1 
H47C H 0.1818 0.9286 0.9721 0.093 Uiso 0.50 1 d PG A 1 
C48 C 0.0311(17) 0.7117(17) 0.9871(10) 0.062(2) Uiso 0.50 1 d PG A 1 
H48A H 0.0324 0.6193 0.9924 0.093 Uiso 0.50 1 d PG A 1 
H48B H 0.0332 0.7418 1.0286 0.093 Uiso 0.50 1 d PG A 1 
H48C H -0.0546 0.7475 0.9666 0.093 Uiso 0.50 1 d PG A 1 
C45' C 0.155(3) 0.779(4) 0.9482(16) 0.062(2) Uiso 0.25 1 d PG B 2 
O46' O 0.217(4) 0.678(4) 0.935(2) 0.062(2) Uiso 0.25 1 d PG B 2 
C47' C 0.216(5) 0.904(4) 0.928(3) 0.062(2) Uiso 0.25 1 d PG B 2 
H47D H 0.3056 0.8903 0.9043 0.093 Uiso 0.25 1 d PG B 2 
H47E H 0.1507 0.9583 0.9008 0.093 Uiso 0.25 1 d PG B 2 
H47F H 0.2306 0.9447 0.9655 0.093 Uiso 0.25 1 d PG B 2 
C48' C 0.015(4) 0.779(5) 0.986(2) 0.062(2) Uiso 0.25 1 d PG B 2 
H48D H -0.0125 0.6925 0.9956 0.093 Uiso 0.25 1 d PG B 2 
H48E H 0.0237 0.8161 1.0249 0.093 Uiso 0.25 1 d PG B 2 
H48F H -0.0562 0.8297 0.9602 0.093 Uiso 0.25 1 d PG B 2 
C45" C 0.164(3) 0.813(3) 0.9387(11) 0.062(2) Uiso 0.25 1 d PG C 3 
O46" O 0.248(3) 0.730(2) 0.9183(15) 0.062(2) Uiso 0.25 1 d PG C 3 
C47" C 0.199(5) 0.949(3) 0.934(2) 0.062(2) Uiso 0.25 1 d PG C 3 
H47G H 0.2922 0.9575 0.9131 0.093 Uiso 0.25 1 d PG C 3 
H47H H 0.1292 1.0021 0.9086 0.093 Uiso 0.25 1 d PG C 3 
H47I H 0.1970 0.9751 0.9763 0.093 Uiso 0.25 1 d PG C 3 
C48" C 0.023(3) 0.779(5) 0.969(2) 0.062(2) Uiso 0.25 1 d PG C 3 
H48G H 0.0135 0.6885 0.9696 0.093 Uiso 0.25 1 d PG C 3 
H48H H 0.0157 0.8002 1.0130 0.093 Uiso 0.25 1 d PG C 3 
H48I H -0.0521 0.8271 0.9453 0.093 Uiso 0.25 1 d PG C 3 
P1 P 0.7387(5) 0.1478(5) 0.8667(2) 0.0380(8) Uiso 0.47 1 d PG D 1 
F1 F 0.6089(8) 0.2279(9) 0.8311(4) 0.088(6) Uani 0.47 1 d PG D 1 
F2 F 0.8685(9) 0.0676(9) 0.9023(4) 0.073(4) Uani 0.47 1 d PG D 1 
F3 F 0.7072(11) 0.0246(7) 0.8338(4) 0.065(4) Uani 0.47 1 d PG D 1 
F4 F 0.7702(10) 0.2709(7) 0.8996(5) 0.079(4) Uani 0.47 1 d PG D 1 
F5 F 0.6330(10) 0.1040(8) 0.9265(4) 0.071(4) Uani 0.47 1 d PG D 1 
F6 F 0.8444(9) 0.1915(7) 0.8069(4) 0.060(4) Uani 0.47 1 d PG D 1 
P1' P 0.7109(8) 0.1412(7) 0.8708(3) 0.0380(8) Uiso 0.38 1 d PG E 2 
F1' F 0.6167(14) 0.2507(12) 0.8293(6) 0.077(3) Uiso 0.38 1 d PG E 2 
F2' F 0.8051(12) 0.0316(10) 0.9122(6) 0.077(3) Uiso 0.38 1 d PG E 2 
F3' F 0.7101(15) 0.0514(13) 0.8146(6) 0.077(3) Uiso 0.38 1 d PG E 2 
F4' F 0.7116(14) 0.2309(12) 0.9269(5) 0.077(3) Uiso 0.38 1 d PG E 2 
F5' F 0.5690(10) 0.0823(12) 0.9033(7) 0.077(3) Uiso 0.38 1 d PG E 2 
F6' F 0.8528(11) 0.2000(12) 0.8382(6) 0.077(3) Uiso 0.38 1 d PG E 2 
P1" P 0.7273(17) 0.1369(15) 0.8642(7) 0.0380(8) Uiso 0.15 1 d PG F 3 
F1" F 0.5638(18) 0.116(3) 0.8554(15) 0.076(6) Uiso 0.15 1 d PG F 3 
F2" F 0.8908(19) 0.157(3) 0.8730(15) 0.076(6) Uiso 0.15 1 d PG F 3 
F3" F 0.688(3) 0.2873(16) 0.8646(15) 0.076(6) Uiso 0.15 1 d PG F 3 
F4" F 0.766(3) -0.0135(16) 0.8637(15) 0.076(6) Uiso 0.15 1 d PG F 3 
F5" F 0.755(3) 0.159(3) 0.7877(7) 0.076(6) Uiso 0.15 1 d PG F 3 
F6" F 0.700(3) 0.115(3) 0.9406(8) 0.076(6) Uiso 0.15 1 d PG F 3 
P2 P 0.2184(5) 0.1770(5) 0.5550(2) 0.0429(8) Uiso 0.50 1 d PG G 1 
F7 F 0.2431(9) 0.0448(6) 0.6007(4) 0.0737(16) Uiso 0.50 1 d PG G 1 
F8 F 0.1936(9) 0.3093(6) 0.5093(4) 0.0737(16) Uiso 0.50 1 d PG G 1 
F9 F 0.3697(6) 0.2183(8) 0.5723(4) 0.0737(16) Uiso 0.50 1 d PG G 1 
F10 F 0.0670(6) 0.1357(9) 0.5378(4) 0.0737(16) Uiso 0.50 1 d PG G 1 
F11 F 0.1442(9) 0.2428(8) 0.6145(3) 0.0737(16) Uiso 0.50 1 d PG G 1 
F12 F 0.2925(8) 0.1113(8) 0.4955(3) 0.0737(16) Uiso 0.50 1 d PG G 1 
P2' P 0.2008(8) 0.1885(7) 0.5678(4) 0.0429(8) Uiso 0.28 1 d PG H 2 
F7' F 0.2776(16) 0.0558(10) 0.5980(7) 0.074(3) Uiso 0.28 1 d PG H 2 
F8' F 0.1239(15) 0.3211(10) 0.5376(7) 0.074(3) Uiso 0.28 1 d PG H 2 
F9' F 0.2910(14) 0.2643(13) 0.6108(6) 0.074(3) Uiso 0.28 1 d PG H 2 
F10' F 0.1106(15) 0.1125(13) 0.5248(6) 0.074(3) Uiso 0.28 1 d PG H 2 
F11' F 0.0785(12) 0.1766(15) 0.6240(5) 0.074(3) Uiso 0.28 1 d PG H 2 
F12' F 0.3231(12) 0.2003(15) 0.5116(6) 0.074(3) Uiso 0.28 1 d PG H 2 
P2" P 0.2256(10) 0.1720(10) 0.5557(5) 0.0429(8) Uiso 0.22 1 d PG I 3 
F7" F 0.188(2) 0.0640(15) 0.6135(7) 0.075(4) Uiso 0.22 1 d PG I 3 
F8" F 0.263(2) 0.2801(14) 0.4979(7) 0.075(4) Uiso 0.22 1 d PG I 3 
F9" F 0.3909(12) 0.1262(19) 0.5595(9) 0.075(4) Uiso 0.22 1 d PG I 3 
F10" F 0.0602(11) 0.2179(19) 0.5520(9) 0.075(4) Uiso 0.22 1 d PG I 3 
F11" F 0.242(2) 0.2707(15) 0.6064(8) 0.075(4) Uiso 0.22 1 d PG I 3 
F12" F 0.209(2) 0.0734(15) 0.5050(8) 0.075(4) Uiso 0.22 1 d PG I 3 
 
loop_ 
 _atom_site_aniso_label 
 _atom_site_aniso_U_11 
 _atom_site_aniso_U_22 
 _atom_site_aniso_U_33 
 _atom_site_aniso_U_23 
 _atom_site_aniso_U_13 
 _atom_site_aniso_U_12 
Ru 0.0192(3) 0.0186(4) 0.0278(4) -0.0031(3) -0.0006(3) -0.0007(2) 
N1 0.024(4) 0.025(4) 0.024(3) 0.000(3) -0.006(3) -0.006(3) 
C2 0.029(5) 0.028(5) 0.030(4) -0.002(4) 0.004(4) -0.002(4) 
C3 0.044(6) 0.024(5) 0.043(5) -0.007(4) -0.005(4) 0.011(4) 
C4 0.027(5) 0.045(6) 0.042(5) -0.011(4) -0.005(4) 0.010(4) 
C5 0.028(5) 0.044(6) 0.030(5) -0.004(4) 0.005(4) -0.002(4) 
C6 0.021(5) 0.062(7) 0.045(6) -0.010(5) 0.006(4) -0.007(4) 
C7 0.036(6) 0.055(7) 0.048(6) 0.008(5) 0.006(5) -0.021(5) 
C8 0.037(5) 0.042(6) 0.029(5) -0.001(4) 0.000(4) -0.014(4) 
C9 0.052(6) 0.027(5) 0.057(6) 0.003(4) -0.002(5) -0.014(5) 
C10 0.066(7) 0.019(5) 0.047(6) 0.003(4) -0.015(5) -0.005(5) 
C11 0.037(5) 0.026(5) 0.034(5) -0.002(4) -0.011(4) -0.003(4) 
N12 0.024(4) 0.022(4) 0.026(4) 0.001(3) -0.004(3) 0.000(3) 
C13 0.023(5) 0.030(5) 0.028(4) -0.002(4) -0.002(4) -0.003(4) 
C14 0.015(4) 0.032(5) 0.023(4) 0.003(3) -0.007(3) 0.000(3) 
C15 0.042(6) 0.031(5) 0.039(5) -0.005(4) -0.017(4) 0.011(4) 
O16 0.060(5) 0.023(4) 0.089(5) -0.020(3) -0.021(4) 0.014(3) 
N17 0.022(4) 0.040(4) 0.027(4) -0.008(3) -0.005(3) 0.000(3) 
C18 0.041(5) 0.032(5) 0.035(5) -0.010(4) -0.009(4) 0.016(4) 
C19 0.057(7) 0.044(6) 0.047(6) -0.019(5) -0.014(5) 0.028(5) 
C20 0.035(6) 0.067(8) 0.052(6) -0.022(5) -0.006(5) 0.018(5) 
C21 0.025(5) 0.073(8) 0.038(5) -0.023(5) -0.003(4) 0.010(5) 
C22 0.020(5) 0.110(10) 0.046(6) -0.037(6) 0.002(4) -0.002(6) 
C23 0.026(6) 0.099(10) 0.050(6) -0.024(6) 0.011(5) -0.021(6) 
C24 0.027(5) 0.067(7) 0.030(5) -0.013(5) -0.001(4) -0.017(5) 
C25 0.041(6) 0.069(8) 0.038(5) -0.014(5) 0.008(5) -0.031(5) 
C26 0.054(7) 0.044(6) 0.041(5) -0.010(4) 0.005(5) -0.027(5) 
C27 0.038(5) 0.030(5) 0.044(5) -0.005(4) 0.003(4) -0.010(4) 
N28 0.026(4) 0.039(4) 0.024(4) -0.008(3) -0.002(3) -0.004(3) 
C29 0.017(4) 0.057(6) 0.019(4) -0.008(4) 0.000(3) -0.009(4) 
C30 0.022(5) 0.055(6) 0.023(4) -0.010(4) -0.008(4) 0.003(4) 
N31 0.017(3) 0.028(4) 0.026(4) 0.000(3) 0.004(3) -0.005(3) 
C32 0.028(5) 0.028(5) 0.036(5) -0.005(4) 0.003(4) -0.008(4) 
C33 0.046(6) 0.033(5) 0.033(5) -0.012(4) -0.003(4) -0.012(4) 
C34 0.029(5) 0.038(5) 0.033(5) 0.003(4) 0.001(4) -0.016(4) 
C35 0.031(5) 0.028(5) 0.033(5) 0.001(4) -0.002(4) -0.002(4) 
C36 0.026(5) 0.024(5) 0.031(5) -0.007(4) 0.002(4) -0.001(3) 
C37 0.056(6) 0.049(6) 0.033(5) -0.003(4) -0.004(5) -0.016(5) 
N38 0.018(3) 0.024(4) 0.028(4) -0.010(3) -0.002(3) 0.003(3) 
C39 0.028(5) 0.023(5) 0.033(5) -0.001(4) -0.007(4) 0.001(4) 
C40 0.031(5) 0.021(4) 0.033(5) 0.003(4) -0.004(4) -0.002(4) 
C41 0.026(5) 0.033(5) 0.027(4) 0.001(4) 0.000(4) -0.001(4) 
C42 0.032(5) 0.024(5) 0.033(5) -0.012(4) -0.003(4) 0.000(4) 
C43 0.030(5) 0.024(5) 0.030(5) 0.000(4) 0.000(4) -0.004(4) 
C44 0.065(7) 0.042(6) 0.036(5) -0.010(4) -0.012(5) -0.001(5) 
F1 0.055(8) 0.065(10) 0.126(12) 0.059(9) -0.038 0.013(7) 
F2 0.056(9) 0.079(10) 0.072(9) 0.012(8) -0.021(7) 0.043(7) 
F3 0.105(12) 0.029(7) 0.069(9) -0.014(7) -0.014(8) -0.037(7) 
F4 0.091(11) 0.047(7) 0.111(10) -0.046 -0.009(9) -0.018(8) 
F5 0.067(10) 0.082(11) 0.057(8) 0.008(7) 0.011(7) 0.016(8) 
F6 0.072(9) 0.052(8) 0.055(8) -0.005(6) 0.025(7) -0.021(7) 
 
_geom_special_details 
; 
 All esds (except the esd in the dihedral angle between two l.s. planes) 
 are estimated using the full covariance matrix.  The cell esds are taken 
 into account individually in the estimation of esds in distances, angles 
 and torsion angles; correlations between esds in cell parameters are only 
 used when they are defined by crystal symmetry.  An approximate (isotropic) 
 treatment of cell esds is used for estimating esds involving l.s. planes. 
; 
 
loop_ 
 _geom_bond_atom_site_label_1 
 _geom_bond_atom_site_label_2 
 _geom_bond_distance 
 _geom_bond_site_symmetry_2 
 _geom_bond_publ_flag 
Ru N17 2.015(7) . ? 
Ru N12 2.027(6) . ? 
Ru N38 2.097(6) . ? 
Ru N1 2.109(6) . ? 
Ru N28 2.108(6) . ? 
Ru N31 2.110(6) . ? 
N1 C2 1.338(10) . ? 
N1 C14 1.362(9) . ? 
C2 C3 1.397(11) . ? 
C3 C4 1.360(12) . ? 
C4 C5 1.407(12) . ? 
C5 C14 1.387(11) . ? 
C5 C6 1.429(12) . ? 
C6 C7 1.351(13) . ? 
C7 C8 1.417(13) . ? 
C8 C9 1.404(12) . ? 
C8 C13 1.411(11) . ? 
C9 C10 1.344(13) . ? 
C10 C11 1.400(12) . ? 
C11 N12 1.350(10) . ? 
C11 C15 1.509(12) . ? 
N12 C13 1.370(10) . ? 
C13 C14 1.439(11) . ? 
C15 O16 1.229(10) . ? 
C15 C18 1.485(12) . ? 
N17 C18 1.361(10) . ? 
N17 C30 1.374(10) . ? 
C18 C19 1.412(12) . ? 
C19 C20 1.355(14) . ? 
C20 C21 1.401(14) . ? 
C21 C30 1.400(12) . ? 
C21 C22 1.429(14) . ? 
C22 C23 1.350(15) . ? 
C23 C24 1.422(14) . ? 
C24 C29 1.412(11) . ? 
C24 C25 1.402(13) . ? 
C25 C26 1.356(13) . ? 
C26 C27 1.396(11) . ? 
C27 N28 1.333(10) . ? 
N28 C29 1.369(10) . ? 
C29 C30 1.435(12) . ? 
N31 C32 1.334(10) . ? 
N31 C36 1.361(10) . ? 
C32 C33 1.379(11) . ? 
C33 C34 1.388(12) . ? 
C34 C35 1.403(11) . ? 
C34 C37 1.496(11) . ? 
C35 C36 1.376(11) . ? 
N38 C39 1.335(10) . ? 
N38 C43 1.367(9) . ? 
C39 C40 1.382(11) . ? 
C40 C41 1.382(11) . ? 
C41 C42 1.390(11) . ? 
C41 C44 1.498(11) . ? 
C42 C43 1.374(11) . ? 
C45 O46 1.2201 . ? 
C45 C48 1.4797 . ? 
C45 C47 1.4801 . ? 
C45' O46' 1.2199 . ? 
C45' C47' 1.4800 . ? 
C45' C48' 1.4801 . ? 
C45" O46" 1.2199 . ? 
C45" C47" 1.4800 . ? 
C45" C48" 1.4800 . ? 
P1 F4 1.5899 . ? 
P1 F3 1.5900 . ? 
P1 F6 1.5900 . ? 
P1 F5 1.5900 . ? 
P1 F1 1.5901 . ? 
P1 F2 1.5902 . ? 
P1' F4' 1.5898 . ? 
P1' F1' 1.5899 . ? 
P1' F6' 1.5899 . ? 
P1' F5' 1.5900 . ? 
P1' F3' 1.5901 . ? 
P1' F2' 1.5901 . ? 
P1" F1" 1.5899 . ? 
P1" F3" 1.5900 . ? 
P1" F5" 1.5900 . ? 
P1" F2" 1.5901 . ? 
P1" F4" 1.5901 . ? 
P1" F6" 1.5901 . ? 
P2 F9 1.5899 . ? 
P2 F12 1.5900 . ? 
P2 F8 1.5900 . ? 
P2 F10 1.5901 . ? 
P2 F11 1.5901 . ? 
P2 F7 1.5902 . ? 
P2' F8' 1.5899 . ? 
P2' F10' 1.5900 . ? 
P2' F7' 1.5900 . ? 
P2' F9' 1.5900 . ? 
P2' F12' 1.5901 . ? 
P2' F11' 1.5901 . ? 
P2" F11" 1.5899 . ? 
P2" F12" 1.5899 . ? 
P2" F10" 1.5900 . ? 
P2" F7" 1.5900 . ? 
P2" F8" 1.5900 . ? 
P2" F9" 1.5900 . ? 
 
loop_ 
 _geom_angle_atom_site_label_1 
 _geom_angle_atom_site_label_2 
 _geom_angle_atom_site_label_3 
 _geom_angle 
 _geom_angle_site_symmetry_1 
 _geom_angle_site_symmetry_3 
 _geom_angle_publ_flag 
N17 Ru N12 92.9(3) . . ? 
N17 Ru N38 90.1(2) . . ? 
N12 Ru N38 88.9(2) . . ? 
N17 Ru N1 172.7(3) . . ? 
N12 Ru N1 80.0(2) . . ? 
N38 Ru N1 87.8(2) . . ? 
N17 Ru N28 80.2(3) . . ? 
N12 Ru N28 172.9(3) . . ? 
N38 Ru N28 89.5(2) . . ? 
N1 Ru N28 106.8(2) . . ? 
N17 Ru N31 90.6(2) . . ? 
N12 Ru N31 93.9(2) . . ? 
N38 Ru N31 177.1(2) . . ? 
N1 Ru N31 91.8(2) . . ? 
N28 Ru N31 87.8(2) . . ? 
C2 N1 C14 116.0(7) . . ? 
C2 N1 Ru 131.8(5) . . ? 
C14 N1 Ru 112.1(5) . . ? 
N1 C2 C3 123.4(7) . . ? 
C4 C3 C2 119.8(8) . . ? 
C3 C4 C5 118.8(8) . . ? 
C14 C5 C4 117.5(7) . . ? 
C14 C5 C6 119.5(8) . . ? 
C4 C5 C6 123.0(8) . . ? 
C7 C6 C5 121.8(8) . . ? 
C6 C7 C8 120.1(8) . . ? 
C9 C8 C13 117.0(8) . . ? 
C9 C8 C7 123.4(8) . . ? 
C13 C8 C7 119.6(8) . . ? 
C10 C9 C8 119.5(8) . . ? 
C9 C10 C11 121.2(8) . . ? 
N12 C11 C10 121.6(8) . . ? 
N12 C11 C15 120.7(7) . . ? 
C10 C11 C15 117.6(8) . . ? 
C11 N12 C13 117.1(7) . . ? 
C11 N12 Ru 128.4(5) . . ? 
C13 N12 Ru 114.3(5) . . ? 
N12 C13 C8 123.4(7) . . ? 
N12 C13 C14 116.8(6) . . ? 
C8 C13 C14 119.8(7) . . ? 
N1 C14 C5 124.5(7) . . ? 
N1 C14 C13 116.3(7) . . ? 
C5 C14 C13 119.2(7) . . ? 
O16 C15 C18 117.2(8) . . ? 
O16 C15 C11 116.2(8) . . ? 
C18 C15 C11 126.6(7) . . ? 
C18 N17 C30 117.1(7) . . ? 
C18 N17 Ru 127.8(6) . . ? 
C30 N17 Ru 115.1(6) . . ? 
N17 C18 C19 121.1(9) . . ? 
N17 C18 C15 121.6(7) . . ? 
C19 C18 C15 117.3(8) . . ? 
C20 C19 C18 120.6(9) . . ? 
C19 C20 C21 120.2(9) . . ? 
C20 C21 C30 116.8(9) . . ? 
C20 C21 C22 124.2(9) . . ? 
C30 C21 C22 119.0(10) . . ? 
C23 C22 C21 120.9(9) . . ? 
C22 C23 C24 121.7(9) . . ? 
C29 C24 C25 117.8(9) . . ? 
C29 C24 C23 118.7(9) . . ? 
C25 C24 C23 123.5(9) . . ? 
C26 C25 C24 118.8(8) . . ? 
C25 C26 C27 120.1(9) . . ? 
N28 C27 C26 123.8(9) . . ? 
C27 N28 C29 116.1(7) . . ? 
C27 N28 Ru 132.2(6) . . ? 
C29 N28 Ru 111.7(5) . . ? 
N28 C29 C24 123.4(8) . . ? 
N28 C29 C30 117.0(7) . . ? 
C24 C29 C30 119.6(8) . . ? 
N17 C30 C21 124.1(9) . . ? 
N17 C30 C29 115.9(7) . . ? 
C21 C30 C29 120.0(8) . . ? 
C32 N31 C36 116.3(7) . . ? 
C32 N31 Ru 123.3(5) . . ? 
C36 N31 Ru 120.3(5) . . ? 
N31 C32 C33 123.0(8) . . ? 
C32 C33 C34 121.5(8) . . ? 
C33 C34 C35 115.6(8) . . ? 
C33 C34 C37 121.9(8) . . ? 
C35 C34 C37 122.5(8) . . ? 
C36 C35 C34 119.9(8) . . ? 
N31 C36 C35 123.7(7) . . ? 
C39 N38 C43 116.5(7) . . ? 
C39 N38 Ru 123.9(5) . . ? 
C43 N38 Ru 119.6(5) . . ? 
N38 C39 C40 123.6(7) . . ? 
C41 C40 C39 120.1(7) . . ? 
C40 C41 C42 116.6(7) . . ? 
C40 C41 C44 122.3(7) . . ? 
C42 C41 C44 121.0(7) . . ? 
C43 C42 C41 120.7(7) . . ? 
C42 C43 N38 122.4(7) . . ? 
O46 C45 C48 121.1 . . ? 
O46 C45 C47 121.1 . . ? 
C48 C45 C47 117.7 . . ? 
O46' C45' C47' 121.2 . . ? 
O46' C45' C48' 121.14(5) . . ? 
C47' C45' C48' 117.7 . . ? 
O46" C45" C47" 121.1 . . ? 
O46" C45" C48" 121.1 . . ? 
C47" C45" C48" 117.7 . . ? 
F4 P1 F3 180.0 . . ? 
F4 P1 F6 90.0 . . ? 
F3 P1 F6 90.0 . . ? 
F4 P1 F5 90.0 . . ? 
F3 P1 F5 90.0 . . ? 
F6 P1 F5 180.0(5) . . ? 
F4 P1 F1 90.0 . . ? 
F3 P1 F1 90.0 . . ? 
F6 P1 F1 90.0 . . ? 
F5 P1 F1 90.0 . . ? 
F4 P1 F2 90.0 . . ? 
F3 P1 F2 90.0 . . ? 
F6 P1 F2 90.0 . . ? 
F5 P1 F2 90.0 . . ? 
F1 P1 F2 180.0 . . ? 
F4' P1' F1' 90.0 . . ? 
F4' P1' F6' 90.0 . . ? 
F1' P1' F6' 90.0 . . ? 
F4' P1' F5' 90.0 . . ? 
F1' P1' F5' 90.0 . . ? 
F6' P1' F5' 180.0 . . ? 
F4' P1' F3' 180.0(10) . . ? 
F1' P1' F3' 90.0 . . ? 
F6' P1' F3' 90.0 . . ? 
F5' P1' F3' 90.0 . . ? 
F4' P1' F2' 90.0 . . ? 
F1' P1' F2' 180.0 . . ? 
F6' P1' F2' 90.0 . . ? 
F5' P1' F2' 90.0 . . ? 
F3' P1' F2' 90.0 . . ? 
F1" P1" F3" 90.0 . . ? 
F1" P1" F5" 90.0 . . ? 
F3" P1" F5" 90.0 . . ? 
F1" P1" F2" 179.98(8) . . ? 
F3" P1" F2" 90.0 . . ? 
F5" P1" F2" 90.0 . . ? 
F1" P1" F4" 90.0 . . ? 
F3" P1" F4" 179.99(5) . . ? 
F5" P1" F4" 90.0 . . ? 
F2" P1" F4" 90.0 . . ? 
F1" P1" F6" 90.0 . . ? 
F3" P1" F6" 90.0 . . ? 
F5" P1" F6" 180.0 . . ? 
F2" P1" F6" 90.0 . . ? 
F4" P1" F6" 90.0 . . ? 
F9 P2 F12 90.0 . . ? 
F9 P2 F8 90.0 . . ? 
F12 P2 F8 90.0 . . ? 
F9 P2 F10 180.0 . . ? 
F12 P2 F10 90.0 . . ? 
F8 P2 F10 90.0 . . ? 
F9 P2 F11 90.0 . . ? 
F12 P2 F11 180.0 . . ? 
F8 P2 F11 90.0 . . ? 
F10 P2 F11 90.0 . . ? 
F9 P2 F7 90.0 . . ? 
F12 P2 F7 90.0 . . ? 
F8 P2 F7 180.0(6) . . ? 
F10 P2 F7 90.0 . . ? 
F11 P2 F7 90.0 . . ? 
F8' P2' F10' 90.0 . . ? 
F8' P2' F7' 180.0 . . ? 
F10' P2' F7' 90.0 . . ? 
F8' P2' F9' 90.0 . . ? 
F10' P2' F9' 180.0 . . ? 
F7' P2' F9' 90.0 . . ? 
F8' P2' F12' 90.0 . . ? 
F10' P2' F12' 90.0 . . ? 
F7' P2' F12' 90.0 . . ? 
F9' P2' F12' 90.0 . . ? 
F8' P2' F11' 90.0 . . ? 
F10' P2' F11' 90.0 . . ? 
F7' P2' F11' 90.0 . . ? 
F9' P2' F11' 90.0 . . ? 
F12' P2' F11' 180.0(6) . . ? 
F11" P2" F12" 180.0(7) . . ? 
F11" P2" F10" 90.0 . . ? 
F12" P2" F10" 90.0 . . ? 
F11" P2" F7" 90.0 . . ? 
F12" P2" F7" 90.0 . . ? 
F10" P2" F7" 90.0 . . ? 
F11" P2" F8" 90.0 . . ? 
F12" P2" F8" 90.0 . . ? 
F10" P2" F8" 90.0 . . ? 
F7" P2" F8" 180.0(11) . . ? 
F11" P2" F9" 90.0 . . ? 
F12" P2" F9" 90.0 . . ? 
F10" P2" F9" 180.0 . . ? 
F7" P2" F9" 90.0 . . ? 
F8" P2" F9" 90.0 . . ? 
 
loop_ 
 _geom_torsion_atom_site_label_1 
 _geom_torsion_atom_site_label_2 
 _geom_torsion_atom_site_label_3 
 _geom_torsion_atom_site_label_4 
 _geom_torsion 
 _geom_torsion_site_symmetry_1 
 _geom_torsion_site_symmetry_2 
 _geom_torsion_site_symmetry_3 
 _geom_torsion_site_symmetry_4 
 _geom_torsion_publ_flag 
N17 Ru N1 C2 -167.1(17) . . . . ? 
N12 Ru N1 C2 177.2(7) . . . . ? 
N38 Ru N1 C2 -93.5(7) . . . . ? 
N28 Ru N1 C2 -4.7(7) . . . . ? 
N31 Ru N1 C2 83.6(7) . . . . ? 
N17 Ru N1 C14 10(2) . . . . ? 
N12 Ru N1 C14 -5.4(5) . . . . ? 
N38 Ru N1 C14 83.9(5) . . . . ? 
N28 Ru N1 C14 172.7(5) . . . . ? 
N31 Ru N1 C14 -99.0(5) . . . . ? 
C14 N1 C2 C3 -0.7(11) . . . . ? 
Ru N1 C2 C3 176.6(6) . . . . ? 
N1 C2 C3 C4 -0.8(13) . . . . ? 
C2 C3 C4 C5 2.2(12) . . . . ? 
C3 C4 C5 C14 -2.2(12) . . . . ? 
C3 C4 C5 C6 177.2(8) . . . . ? 
C14 C5 C6 C7 -0.5(13) . . . . ? 
C4 C5 C6 C7 -179.8(9) . . . . ? 
C5 C6 C7 C8 1.1(14) . . . . ? 
C6 C7 C8 C9 178.7(9) . . . . ? 
C6 C7 C8 C13 -0.7(13) . . . . ? 
C13 C8 C9 C10 0.7(13) . . . . ? 
C7 C8 C9 C10 -178.7(9) . . . . ? 
C8 C9 C10 C11 -0.5(14) . . . . ? 
C9 C10 C11 N12 0.0(13) . . . . ? 
C9 C10 C11 C15 -179.6(8) . . . . ? 
C10 C11 N12 C13 0.3(11) . . . . ? 
C15 C11 N12 C13 179.9(7) . . . . ? 
C10 C11 N12 Ru -175.3(6) . . . . ? 
C15 C11 N12 Ru 4.3(11) . . . . ? 
N17 Ru N12 C11 3.1(7) . . . . ? 
N38 Ru N12 C11 93.1(6) . . . . ? 
N1 Ru N12 C11 -178.9(7) . . . . ? 
N28 Ru N12 C11 16(2) . . . . ? 
N31 Ru N12 C11 -87.7(7) . . . . ? 
N17 Ru N12 C13 -172.6(5) . . . . ? 
N38 Ru N12 C13 -82.6(5) . . . . ? 
N1 Ru N12 C13 5.4(5) . . . . ? 
N28 Ru N12 C13 -159.7(18) . . . . ? 
N31 Ru N12 C13 96.6(5) . . . . ? 
C11 N12 C13 C8 -0.1(11) . . . . ? 
Ru N12 C13 C8 176.1(6) . . . . ? 
C11 N12 C13 C14 179.1(7) . . . . ? 
Ru N12 C13 C14 -4.7(8) . . . . ? 
C9 C8 C13 N12 -0.4(12) . . . . ? 
C7 C8 C13 N12 179.0(8) . . . . ? 
C9 C8 C13 C14 -179.6(7) . . . . ? 
C7 C8 C13 C14 -0.2(12) . . . . ? 
C2 N1 C14 C5 0.6(11) . . . . ? 
Ru N1 C14 C5 -177.2(6) . . . . ? 
C2 N1 C14 C13 -177.6(7) . . . . ? 
Ru N1 C14 C13 4.6(8) . . . . ? 
C4 C5 C14 N1 0.8(12) . . . . ? 
C6 C5 C14 N1 -178.6(7) . . . . ? 
C4 C5 C14 C13 179.0(7) . . . . ? 
C6 C5 C14 C13 -0.4(11) . . . . ? 
N12 C13 C14 N1 -0.1(10) . . . . ? 
C8 C13 C14 N1 179.1(7) . . . . ? 
N12 C13 C14 C5 -178.5(7) . . . . ? 
C8 C13 C14 C5 0.7(11) . . . . ? 
N12 C11 C15 O16 165.0(7) . . . . ? 
C10 C11 C15 O16 -15.4(11) . . . . ? 
N12 C11 C15 C18 -15.7(12) . . . . ? 
C10 C11 C15 C18 163.9(8) . . . . ? 
N12 Ru N17 C18 -1.7(7) . . . . ? 
N38 Ru N17 C18 -90.7(7) . . . . ? 
N1 Ru N17 C18 -17(2) . . . . ? 
N28 Ru N17 C18 179.9(7) . . . . ? 
N31 Ru N17 C18 92.2(7) . . . . ? 
N12 Ru N17 C30 175.5(5) . . . . ? 
N38 Ru N17 C30 86.6(5) . . . . ? 
N1 Ru N17 C30 160.1(17) . . . . ? 
N28 Ru N17 C30 -2.9(5) . . . . ? 
N31 Ru N17 C30 -90.6(5) . . . . ? 
C30 N17 C18 C19 -2.3(11) . . . . ? 
Ru N17 C18 C19 174.8(6) . . . . ? 
C30 N17 C18 C15 175.8(7) . . . . ? 
Ru N17 C18 C15 -7.0(11) . . . . ? 
O16 C15 C18 N17 -163.5(8) . . . . ? 
C11 C15 C18 N17 17.2(13) . . . . ? 
O16 C15 C18 C19 14.7(12) . . . . ? 
C11 C15 C18 C19 -164.7(8) . . . . ? 
N17 C18 C19 C20 2.5(13) . . . . ? 
C15 C18 C19 C20 -175.7(8) . . . . ? 
C18 C19 C20 C21 0.5(14) . . . . ? 
C19 C20 C21 C30 -3.3(13) . . . . ? 
C19 C20 C21 C22 177.6(9) . . . . ? 
C20 C21 C22 C23 -179.7(9) . . . . ? 
C30 C21 C22 C23 1.2(14) . . . . ? 
C21 C22 C23 C24 -1.4(15) . . . . ? 
C22 C23 C24 C29 0.2(14) . . . . ? 
C22 C23 C24 C25 -178.9(9) . . . . ? 
C29 C24 C25 C26 0.0(12) . . . . ? 
C23 C24 C25 C26 179.1(8) . . . . ? 
C24 C25 C26 C27 -0.5(13) . . . . ? 
C25 C26 C27 N28 1.3(14) . . . . ? 
C26 C27 N28 C29 -1.5(12) . . . . ? 
C26 C27 N28 Ru 178.2(6) . . . . ? 
N17 Ru N28 C27 -178.5(7) . . . . ? 
N12 Ru N28 C27 168.4(18) . . . . ? 
N38 Ru N28 C27 91.4(7) . . . . ? 
N1 Ru N28 C27 3.8(8) . . . . ? 
N31 Ru N28 C27 -87.5(7) . . . . ? 
N17 Ru N28 C29 1.2(5) . . . . ? 
N12 Ru N28 C29 -12(2) . . . . ? 
N38 Ru N28 C29 -89.0(5) . . . . ? 
N1 Ru N28 C29 -176.5(5) . . . . ? 
N31 Ru N28 C29 92.2(5) . . . . ? 
C27 N28 C29 C24 0.9(11) . . . . ? 
Ru N28 C29 C24 -178.8(6) . . . . ? 
C27 N28 C29 C30 -179.7(7) . . . . ? 
Ru N28 C29 C30 0.6(8) . . . . ? 
C25 C24 C29 N28 -0.3(12) . . . . ? 
C23 C24 C29 N28 -179.4(8) . . . . ? 
C25 C24 C29 C30 -179.6(7) . . . . ? 
C23 C24 C29 C30 1.2(12) . . . . ? 
C18 N17 C30 C21 -0.7(11) . . . . ? 
Ru N17 C30 C21 -178.2(6) . . . . ? 
C18 N17 C30 C29 -178.4(7) . . . . ? 
Ru N17 C30 C29 4.1(8) . . . . ? 
C20 C21 C30 N17 3.5(12) . . . . ? 
C22 C21 C30 N17 -177.3(8) . . . . ? 
C20 C21 C30 C29 -178.9(8) . . . . ? 
C22 C21 C30 C29 0.2(12) . . . . ? 
N28 C29 C30 N17 -3.1(10) . . . . ? 
C24 C29 C30 N17 176.3(7) . . . . ? 
N28 C29 C30 C21 179.2(7) . . . . ? 
C24 C29 C30 C21 -1.5(11) . . . . ? 
N17 Ru N31 C32 -46.6(6) . . . . ? 
N12 Ru N31 C32 46.3(6) . . . . ? 
N38 Ru N31 C32 -150(5) . . . . ? 
N1 Ru N31 C32 126.5(6) . . . . ? 
N28 Ru N31 C32 -126.8(6) . . . . ? 
N17 Ru N31 C36 131.8(6) . . . . ? 
N12 Ru N31 C36 -135.3(6) . . . . ? 
N38 Ru N31 C36 28(5) . . . . ? 
N1 Ru N31 C36 -55.1(6) . . . . ? 
N28 Ru N31 C36 51.6(6) . . . . ? 
C36 N31 C32 C33 -1.7(11) . . . . ? 
Ru N31 C32 C33 176.7(6) . . . . ? 
N31 C32 C33 C34 1.3(13) . . . . ? 
C32 C33 C34 C35 0.1(12) . . . . ? 
C32 C33 C34 C37 -179.2(8) . . . . ? 
C33 C34 C35 C36 -0.8(12) . . . . ? 
C37 C34 C35 C36 178.5(8) . . . . ? 
C32 N31 C36 C35 1.0(11) . . . . ? 
Ru N31 C36 C35 -177.6(6) . . . . ? 
C34 C35 C36 N31 0.3(12) . . . . ? 
N17 Ru N38 C39 52.1(6) . . . . ? 
N12 Ru N38 C39 -40.8(6) . . . . ? 
N1 Ru N38 C39 -120.9(6) . . . . ? 
N28 Ru N38 C39 132.3(6) . . . . ? 
N31 Ru N38 C39 156(5) . . . . ? 
N17 Ru N38 C43 -125.7(6) . . . . ? 
N12 Ru N38 C43 141.4(6) . . . . ? 
N1 Ru N38 C43 61.3(6) . . . . ? 
N28 Ru N38 C43 -45.5(6) . . . . ? 
N31 Ru N38 C43 -22(5) . . . . ? 
C43 N38 C39 C40 -0.3(11) . . . . ? 
Ru N38 C39 C40 -178.2(6) . . . . ? 
N38 C39 C40 C41 1.1(12) . . . . ? 
C39 C40 C41 C42 -1.4(11) . . . . ? 
C39 C40 C41 C44 177.4(8) . . . . ? 
C40 C41 C42 C43 1.1(11) . . . . ? 
C44 C41 C42 C43 -177.8(8) . . . . ? 
C41 C42 C43 N38 -0.4(12) . . . . ? 
C39 N38 C43 C42 -0.1(11) . . . . ? 
Ru N38 C43 C42 177.9(6) . . . . ? 
 
_diffrn_measured_fraction_theta_max    0.993 
_diffrn_reflns_theta_full              23.53 
_diffrn_measured_fraction_theta_full   0.993 
_refine_diff_density_max    0.965 
_refine_diff_density_min   -1.302 
_refine_diff_density_rms    0.122 
